# Supplementary material
Source: PubMed Central journal article supplement (PMC130039)

**Figure 1 : Restrictions on work by age-groups and sex (%)**

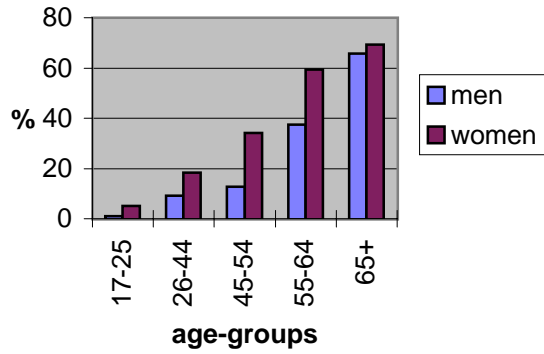

**Figure 2: Restrictions on social contacts by age and sex (%)**

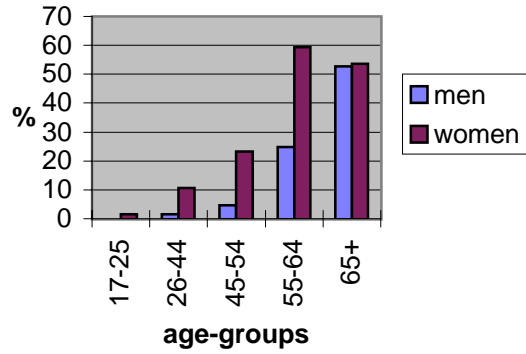

**Figure 3 : Restrictions on mobility by age and sex (%)**

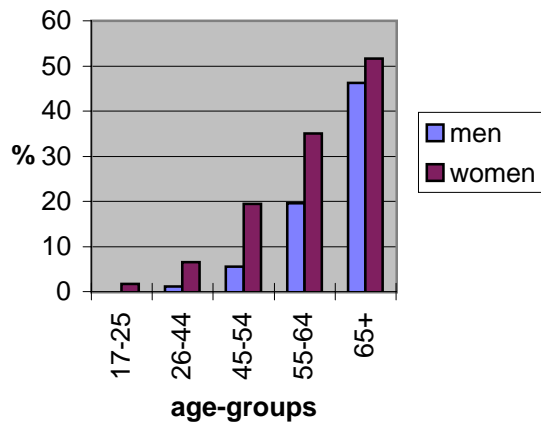

**Figure 4 : Restrictions on dressing by age and sex (%)**

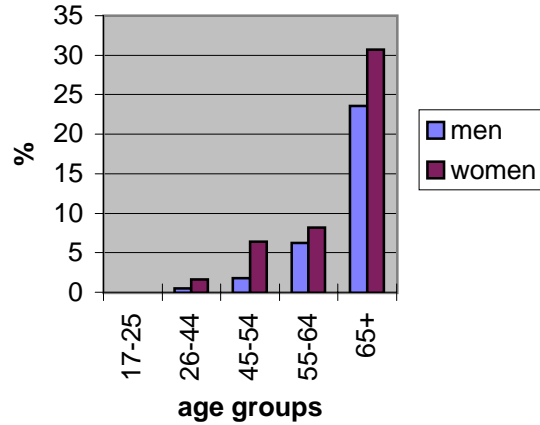

**Figure 5: Restrictions on eating by age and sex**

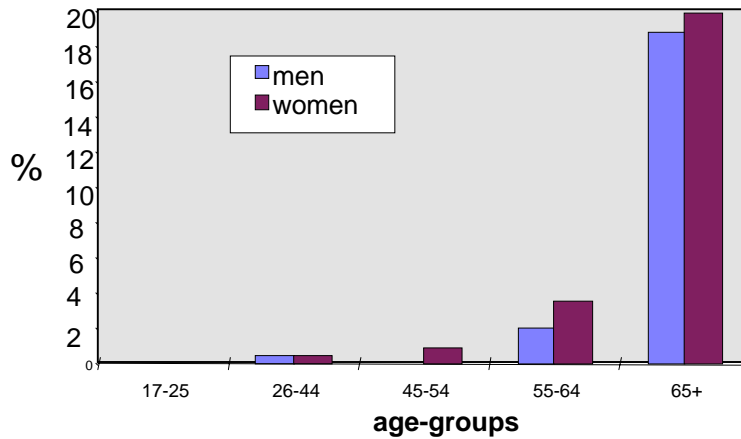

Supplement: 1472-6963-2-20-S2.pdf [file 1472-6963-2-20-S2.pdf]
